# Supplementary material for: Inhibition effect of pyridoxamine on lipid hydroperoxide-derived modifications to human serum albumin
Source: PubMed Central journal article supplement (PMC5908094; doi:10.1371/journal.pone.0196050), 2018-04-19

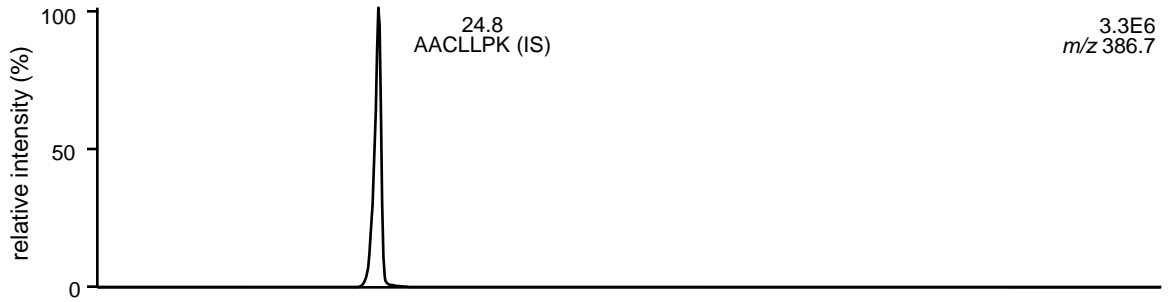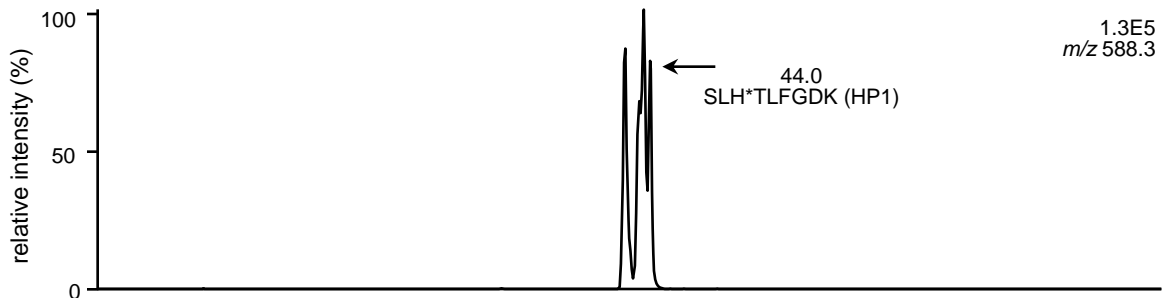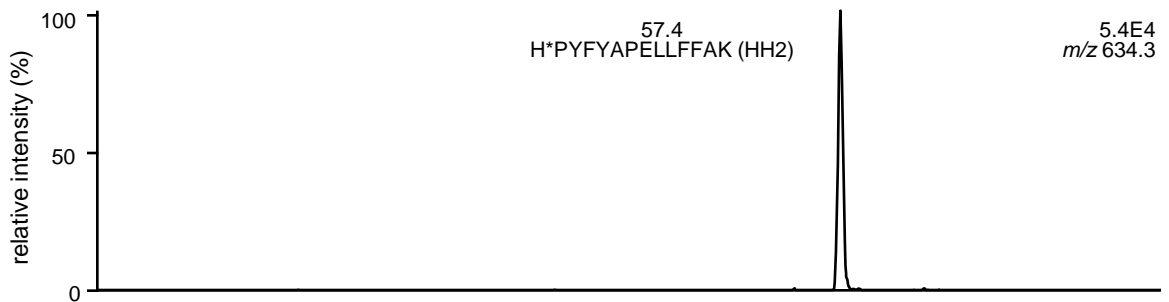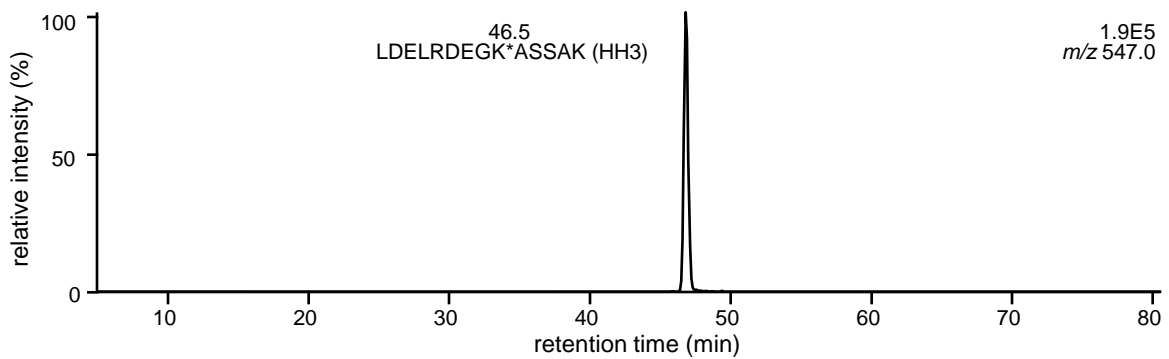

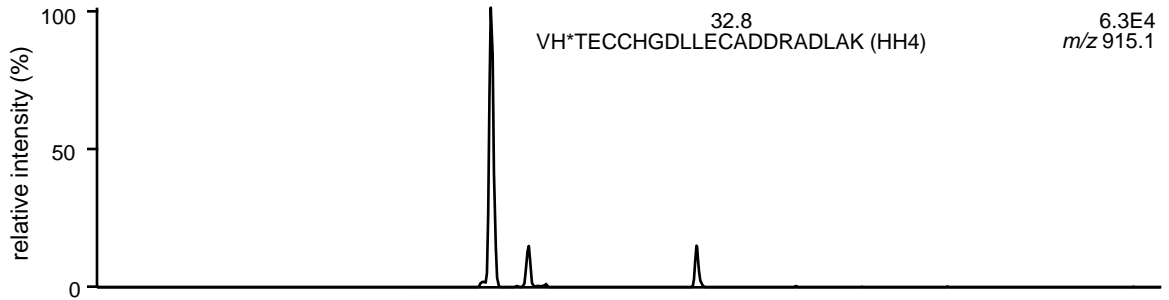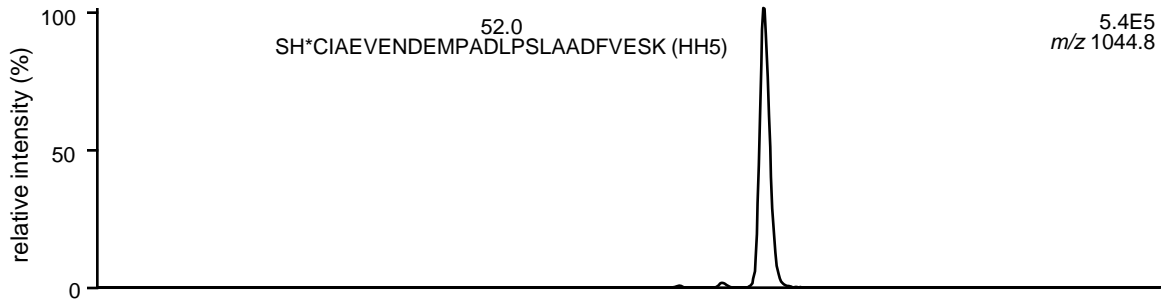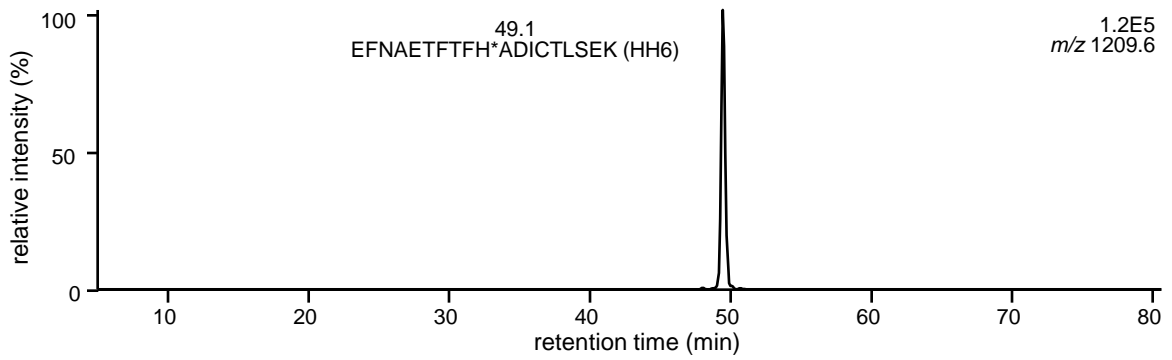

Supplement: pone.0196050.s008.pdf [file pone.0196050.s008.pdf]
