# Supplementary material for: Inhibition effect of pyridoxamine on lipid hydroperoxide-derived modifications to human serum albumin
Source: PubMed Central journal article supplement (PMC5908094; doi:10.1371/journal.pone.0196050), 2018-04-19
Supplement: pone.0196050.s012.pdf [file pone.0196050.s012.pdf]

**S1 Table. List of ONE-modified HSA peptides identified from the reaction between HSA (30  $\mu$ M) and ONE (300  $\mu$ M).**

| Peptide Sequence                 | Modification |                                                | ONE<br>30 $\mu$ M | ONE<br>3 $\mu$ M |
|----------------------------------|--------------|------------------------------------------------|-------------------|------------------|
|                                  | Site         | Type                                           |                   |                  |
| DAH*KSEVAHR                      | H3           | ONE-H <sub>2</sub> O                           |                   |                  |
| DLGEENFK*ALVLIIFAQYLQQCPFEDHVK   | K20          | ONE-H <sub>2</sub> O                           |                   |                  |
| FKDLGEENFK*ALVLIIFAQYLQQCPFEDHVK | K20          | ONE, ONE-H <sub>2</sub> O                      |                   |                  |
| ALVLIIFAQYLQQCPFEDHVK*LVNEVTEFAK | K41          | ONE, ONE-H <sub>2</sub> O                      |                   |                  |
| LVNEVTEFAK*TCVADESAENCDK         | K51          | ONE-H <sub>2</sub> O                           |                   |                  |
| TCVADESAENCDK*SLHTLFGDK          | K64          | ONE, ONE-H <sub>2</sub> O                      |                   |                  |
| TCVADESAENCDKSLH*TLFGDKLCTVATLR  | H67          | ONE-H <sub>2</sub> O                           |                   |                  |
| SLHTLFGDK*LCTVATLR               | K73          | ONE, ONE-H <sub>2</sub> O                      | O                 |                  |
| NECFLQH*KDDNPNLPR                | H105         | ONE-H <sub>2</sub> O                           |                   |                  |
| LVR*PEVDVMCTAFHDNEETFLK          | R117         | ONE-H <sub>2</sub> O                           | O                 |                  |
| LVR*PEVDVMCTAFHDNEETFLKK         | R117         | ONE-H <sub>2</sub> O                           | O                 |                  |
| LVR*PEVDVMCTAFHDNEETFLK*K        | R117/K136    | ONE-H <sub>2</sub> O/ONE, ONE-H <sub>2</sub> O |                   |                  |
| LVRPEVDVMCTAFHDNEETFLK*K         | K136         | ONE                                            |                   |                  |
| K*YLYEIAR                        | K137         | ONE-H <sub>2</sub> O                           | O                 | Δ                |
| R*HPYFYAPPELLFFAK                | R145         | ONE-H <sub>2</sub> O                           |                   |                  |
| R*H*PYFYAPPELLFFAK               | R145/H146    | ONE/ONE                                        |                   |                  |
| HPYFYAPPELLFFAK*R                | K159         | ONE, ONE-H <sub>2</sub> O                      |                   |                  |
| RHPYFYAPPELLFFAK*R               | K159         | ONE, ONE-H <sub>2</sub> O                      |                   |                  |
| R*YK*AAFTECCQAADK                | R159/K162    | ONE-H <sub>2</sub> O/ONE, ONE-H <sub>2</sub> O |                   |                  |
| YK*AAFTECCQAADK                  | K162         | ONE, ONE-H <sub>2</sub> O                      | O                 |                  |
| RYK*AAFTECCQAADK                 | K162         | ONE, ONE-H <sub>2</sub> O                      | O                 |                  |
| LDEL R*DEGK                      | R186         | ONE-H <sub>2</sub> O                           | O                 | O                |
| LDEL RDEGK*ASSAK                 | K190         | ONE-H <sub>2</sub> O                           |                   |                  |
| ASSAK*QR                         | K195         | ONE, ONE-H <sub>2</sub> O                      | O                 | O                |
| LK*CASLQK                        | K199         | ONE-H <sub>2</sub> O                           | O                 | O                |
| FGER*AFK                         | R209         | ONE-H <sub>2</sub> O                           |                   |                  |
| AFK*AWAVAR                       | K212         | ONE, ONE-H <sub>2</sub> O                      | O                 | O                |
| AWAVAR*LSQR                      | R218         | ONE-H <sub>2</sub> O                           |                   |                  |
| AEFAEVSK*LVTDLTK                 | K233         | ONE, ONE-H <sub>2</sub> O                      |                   |                  |
| VH*TECCHGDLLECADDR               | H242         | ONE-H <sub>2</sub> O                           |                   |                  |
| VH*TECCHGDLLECADDRADLAK          | H242         | ONE-H <sub>2</sub> O                           | O                 |                  |
| VH*TECCH*GDLLECADDRADLAK         | H242/H247    | ONE/ONE                                        |                   |                  |
| VHTECCHGDLLECADDR*ADLAK          | R257         | ONE                                            |                   |                  |
| LKECCEK*PLLEK                    | K281         | ONE-H <sub>2</sub> O                           |                   |                  |
| DVCK*NYAEAK                      | K317         | ONE-H <sub>2</sub> O                           |                   |                  |
| NYAEAK*DVFLGMFLYEYAR             | K323         | ONE                                            |                   |                  |
| LAK*TYETTLEK                     | K351         | ONE, ONE-H <sub>2</sub> O                      | O                 | Δ                |
| TYETTLEK*CCAAADPHECYAK           | K359         | ONE-H <sub>2</sub> O                           |                   |                  |

**S1 Table. Continued.**

| Peptide Sequence           | Modification |                                           | ONE<br>30 $\mu$ M | ONE<br>3 $\mu$ M |
|----------------------------|--------------|-------------------------------------------|-------------------|------------------|
|                            | Site         | Type                                      |                   |                  |
| VFDEFK*PLVEEPQNLIK         | K378         | ONE-H <sub>2</sub> O                      |                   |                  |
| QNCELFEQLGEYK*FQNALLVR     | K402         | ONE-H <sub>2</sub> O                      | O                 |                  |
| QNCELFEQLGEYK*FQNALLVR*YTK | K402/R410    | ONE-H <sub>2</sub> O/ONE-H <sub>2</sub> O | O                 | $\Delta$         |
| FQNALLVR*YTK               | R410         | ONE-H <sub>2</sub> O                      | O                 | O                |
| QNCELFEQLGEYK*FQNALLVR*YTK | R410         | ONE-H <sub>2</sub> O                      |                   |                  |
| K*VPQVSTPTLVEVSR           | K414         | ONE, ONE-H <sub>2</sub> O                 | O                 | $\Delta$         |
| NLGK*VGSK                  | K432         | ONE, ONE-H <sub>2</sub> O                 | O                 | O                |
| VGSK*CCK                   | K436         | ONE, ONE-H <sub>2</sub> O                 | O                 | $\Delta$         |
| VGSK*CCKHPEAK              | K436         | ONE-H <sub>2</sub> O                      |                   |                  |
| VTK*CCTESLVNR              | K475         | ONE, ONE-H <sub>2</sub> O                 |                   |                  |
| R*PCFSALEVDETYVPK          | R485         | ONE-H <sub>2</sub> O                      |                   |                  |
| EFNAETFTFHADICTLSEK*ER     | K519         | ONE, ONE-H <sub>2</sub> O                 |                   |                  |
| K*QTALVELVK                | K525         | ONE, ONE-H <sub>2</sub> O                 | O                 | O                |
| ATK*EQLK                   | K541         | ONE-H <sub>2</sub> O                      | O                 | $\Delta$         |
| ATK*EQLKAVMDDFAAFVEK       | K541         | ONE-H <sub>2</sub> O                      |                   |                  |
| ATK*EQLK*AVMDDFAAFVEK      | K541/K545    | ONE-H <sub>2</sub> O/ONE-H <sub>2</sub> O |                   |                  |
| EQLK*AVMDDFAAFVEK          | K545         | ONE, ONE-H <sub>2</sub> O                 | O                 |                  |
| AVMDDFAAFVEK*CCK           | K557         | ONE-H <sub>2</sub> O                      |                   |                  |
| ADDK*ETCFAEEGKK            | K564         | ONE-H <sub>2</sub> O                      |                   |                  |

\* indicates a modification site.

O indicates a peptide identified automatically.

$\Delta$  indicates a peptide identified manually.
