# Supplementary material for: Inhibition effect of pyridoxamine on lipid hydroperoxide-derived modifications to human serum albumin
Source: PubMed Central journal article supplement (PMC5908094; doi:10.1371/journal.pone.0196050), 2018-04-19
Supplement: pone.0196050.s013.pdf [file pone.0196050.s013.pdf]

**S2 Table. List of HNE-modified HSA peptides identified from the reaction between HSA (30  $\mu$ M) and HNE (300  $\mu$ M).**

| Peptide Sequence                 | Modification |                                                  | HNE<br>30 $\mu$ M | HNE<br>3 $\mu$ M |
|----------------------------------|--------------|--------------------------------------------------|-------------------|------------------|
|                                  | Site         | Type                                             |                   |                  |
| DAH*KSEVAHR                      | H3           | HNE-H <sub>2</sub> O                             |                   |                  |
| DAH*KSEVAH*R                     | H3/H9        | HNE, HNE-H <sub>2</sub> O/HNE                    |                   |                  |
| DAH*KSEVAHR                      | K4           | HNE                                              |                   |                  |
| SEVAH*RFKDLGEENFK                | H9           | HNE, HNE-H <sub>2</sub> O                        |                   |                  |
| FK*DLGEENFK                      | K12          | HNE, HNE-2H <sub>2</sub> O                       |                   |                  |
| FK*DLGEENFKALVLIIFAQYLQQCPFEDHVK | K12          | HNE-H <sub>2</sub> O                             |                   |                  |
| FKDLGEENFK*ALVLIIFAQYLQQCPFEDHVK | K20          | HNE                                              |                   |                  |
| ALVLIIFAQYLQQCPFEDH*VK           | H39          | HNE                                              | O                 |                  |
| ALVLIIFAQYLQQCPFEDH*VKLVNEVTEFAK | H39          | HNE-H <sub>2</sub> O                             |                   |                  |
| ALVLIIFAQYLQQCPFEDHVK*LVNEVTEFAK | K41          | HNE-2H <sub>2</sub> O                            |                   |                  |
| TCVADESAENCDK*SLHTLFGDK          | K64          | HNE-H <sub>2</sub> O                             |                   |                  |
| TCVADESAENCDK*SLHTLFGDKLCTVATLR  | K64          | HNE                                              |                   |                  |
| SLH*TLFGDK                       | H67          | HNE                                              | O                 | $\Delta$         |
| SLH*TLFGDKLCTVATLR               | H67          | HNE, HNE-H <sub>2</sub> O                        | O                 |                  |
| TCVADESAENCDKSLH*TLFGDK          | H67          | HNE                                              |                   |                  |
| TCVADESAENCDKSLH*TLFGDKLCTVATLR  | H67          | HNE-H <sub>2</sub> O                             |                   |                  |
| SLHTLFGDK*LCTVATLR               | K73          | HNE-2H <sub>2</sub> O                            |                   |                  |
| NECFLQH*KDDNPNLPR                | H105         | HNE                                              |                   |                  |
| QEPERNECFLQH*KDDNPNLPR           | H105         | HNE, HNE-H <sub>2</sub> O                        |                   |                  |
| QEPERNECFLQH*K*DDNPNLPR          | H105/K106    | HNE/HNE-2H <sub>2</sub> O                        |                   |                  |
| NECFLQHK*DDNPNLPR                | K106         | HNE-H <sub>2</sub> O                             |                   |                  |
| QEPERNECFLQHK*DDNPNLPR           | K106         | HNE-2H <sub>2</sub> O                            |                   |                  |
| LVRPEVDVMCTAFH*DNEETFLK          | H128         | HNE                                              |                   |                  |
| LVRPEVDVMCTAFH*DNEETFLKK         | H128         | HNE, HNE-H <sub>2</sub> O                        |                   |                  |
| LVRPEVDVMCTAFHDNEETFLK*K         | K136         | HNE-2H <sub>2</sub> O                            |                   |                  |
| K*YLIEIAR                        | K137         | HNE, HNE-H <sub>2</sub> O, HNE-2H <sub>2</sub> O |                   |                  |
| H*PYFYAPPELLFFAK                 | H146         | HNE                                              | O                 | $\Delta$         |
| RH*PYFYAPPELLFFAK                | H146         | HNE                                              | O                 | O                |
| RH*PYFYAPPELLFFAK*R              | H146/K159    | HNE/HNE-2H <sub>2</sub> O                        |                   |                  |
| RHPYFYAPPELLFFAK*R               | K159         | HNE-2H <sub>2</sub> O                            |                   |                  |
| RYK*AAFTECCQAADK                 | K162         | HNE, HNE-2H <sub>2</sub> O                       |                   |                  |
| YK*AAFTECCQAADK                  | K162         | HNE, HNE-H <sub>2</sub> O, HNE-2H <sub>2</sub> O |                   |                  |
| AAFTECCQAADK*AACLLPK             | K174         | HNE-2H <sub>2</sub> O                            |                   |                  |
| AACLLPK*LDELREDEGK               | K181         | HNE-2H <sub>2</sub> O                            |                   |                  |
| LDELREDEGK*ASSAK                 | K190         | HNE-2H <sub>2</sub> O                            | O                 | O                |
| DEGK*ASSAK*QR                    | K190/K195    | HNE-2H <sub>2</sub> O/HNE-2H <sub>2</sub> O      |                   |                  |
| ASSAK*QR                         | K195         | HNE, HNE-2H <sub>2</sub> O                       | O                 | $\Delta$         |
| LK*CASLQK                        | K199         | HNE, HNE-H <sub>2</sub> O, HNE-2H <sub>2</sub> O | O                 | O                |

**S2 Table. Continued.**

| Peptide Sequence                             | Modification |                                                  | HNE<br>30 $\mu$ M | HNE<br>3 $\mu$ M |
|----------------------------------------------|--------------|--------------------------------------------------|-------------------|------------------|
|                                              | Site         | Type                                             |                   |                  |
| CASLQK*FGER                                  | K205         | HNE-2H <sub>2</sub> O                            |                   |                  |
| AFK*AWAVAR                                   | K212         | HNE, HNE-H <sub>2</sub> O, HNE-2H <sub>2</sub> O |                   |                  |
| FPK*AEFAEVSK                                 | K225         | HNE                                              |                   |                  |
| AEFAEVSK*LVTDLTK                             | K233         | HNE, HNE-H <sub>2</sub> O                        |                   |                  |
| VH*TECCHGDLLECADDR                           | H242         | HNE                                              |                   |                  |
| VH*TECCHGDLLECADDRDLAK                       | H242         | HNE                                              | O                 | $\Delta$         |
| LVTDLTKVH*TECCHGDLLECADDRDLAK                | H242         | HNE-H <sub>2</sub> O                             |                   |                  |
| VH*TECCH*GDLLECADDR                          | H242/H247    | HNE/HNE                                          |                   |                  |
| VH*TECCH*GDLLECADDRDLAK                      | H242/H247    | HNE/HNE                                          |                   |                  |
| LK*ECCEKPLLEK                                | K276         | HNE                                              |                   |                  |
| LK*ECCEKPLLEKSHCIAEVENDEMPADLPSLA<br>ADFVESK | K276         | HNE                                              |                   |                  |
| LKECCEKPLLEK*SHCIAEVENDEMPADLPSLA<br>ADFVESK | K286         | HNE-2H <sub>2</sub> O                            |                   |                  |
| SH*CIAEVENDEMPADLPSLAADFVESK                 | H288         | HNE                                              | O                 | $\Delta$         |
| SH*CIAEVENDEMPADLPSLAADFVESKDVCK             | H288         | HNE                                              |                   |                  |
| NYAEAK*DVFLGMFLYEYAR                         | K323         | HNE                                              |                   |                  |
| DVCKNYAEAK*DVFLGMFLYEYAR                     | K323         | HNE-H <sub>2</sub> O                             |                   |                  |
| H*PDYSVLLLLR                                 | H338         | HNE                                              |                   |                  |
| RH*PDYSVLLLLR                                | H338         | HNE                                              | O                 | O                |
| LAK*TYETTLEK                                 | K351         | HNE, HNE-H <sub>2</sub> O, HNE-2H <sub>2</sub> O |                   |                  |
| LAKTYETTLEK*CCAAADPHECYAK                    | K359         | HNE-H <sub>2</sub> O                             |                   |                  |
| TYETTLEK*CCAAADPHECYAKVFDEFKPLVEE<br>PQNLIK  | K359         | HNE-H <sub>2</sub> O                             |                   |                  |
| CCAAADPH*ECYAK                               | H367         | HNE                                              |                   |                  |
| VFDEFK*PLVEEPQNLIK                           | K378         | HNE, HNE-H <sub>2</sub> O, HNE-2H <sub>2</sub> O |                   |                  |
| VFDEFKPLVEEPQNLIK*QNCELFEQLGEYK              | K389         | HNE-H <sub>2</sub> O                             |                   |                  |
| QNCELFEQLGEYK*FQNALLVR                       | K402         | HNE, HNE-2H <sub>2</sub> O                       |                   |                  |
| K*VPQVSTPTLVEVSR                             | K414         | HNE, HNE-H <sub>2</sub> O, HNE-2H <sub>2</sub> O | O                 |                  |
| YTKK*VPQVSTPTLVEVSR                          | K414         | HNE-H <sub>2</sub> O                             |                   |                  |
| NLGK*VGSK                                    | K432         | HNE, HNE-2H <sub>2</sub> O                       | O                 | $\Delta$         |
| NLGK*VGSK*CCK                                | K432/K436    | HNE/HNE-2H <sub>2</sub> O                        |                   |                  |
| VGSK*CCK                                     | K436         | HNE, HNE-2H <sub>2</sub> O                       |                   |                  |
| VGSK*CCKHPEAK                                | K436         | HNE, HNE-2H <sub>2</sub> O                       |                   |                  |
| VGSK*CCKH*PEAK                               | K436/H440    | HNE-2H <sub>2</sub> O/HNE, HNE-H <sub>2</sub> O  |                   |                  |
| VGSKCCK*HPEAK                                | K439         | HNE-H <sub>2</sub> O                             |                   |                  |
| CCKH*PEAK                                    | H440         | HNE-H <sub>2</sub> O                             |                   |                  |
| MPCAEDYLSVVLNQLCVLH*EK                       | H464         | HNE                                              |                   |                  |
| MPCAEDYLSVVLNQLCVLH*EKTPVSDR                 | H464         | HNE                                              |                   |                  |
| RMPCAEDYLSVVLNQLCVLH*EK                      | H464         | HNE                                              |                   |                  |
| VTK*CCTESLVNR                                | K475         | HNE                                              |                   |                  |
| RPCFSALEVDETYVPK*EFNAETFTFHADICTLS<br>EK     | K500         | HNE, HNE-H <sub>2</sub> O                        |                   |                  |
| EFNAETFTFH*ADICTLSEK                         | H510         | HNE                                              | O                 | $\Delta$         |

**S2 Table. Continued.**

| Peptide Sequence                           | Modification |                                                  | HNE<br>30 $\mu$ M | HNE<br>3 $\mu$ M |
|--------------------------------------------|--------------|--------------------------------------------------|-------------------|------------------|
|                                            | Site         | Type                                             |                   |                  |
| EFNAETFTFH*ADICTLSEKER                     | H510         | HNE, HNE-H <sub>2</sub> O                        |                   |                  |
| RPCFSALEVDETYVPKEFNAETFTFH*ADICTLS<br>EKER | H510         | HNE                                              |                   |                  |
| EFNAETFTFHADICTLSEK*ER                     | K519         | HNE-2H <sub>2</sub> O                            |                   |                  |
| RPCFSALEVDETYVPKEFNAETFTFHADICTLS<br>EK*ER | K519         | HNE-H <sub>2</sub> O                             |                   |                  |
| K*QTALVELVK                                | K525         | HNE, HNE-H <sub>2</sub> O, HNE-2H <sub>2</sub> O | O                 | Δ                |
| QIKK*QTALVELVK                             | K525         | HNE-H <sub>2</sub> O                             | O                 | Δ                |
| K*QTALVELVK*HKPK                           | K525/K534    | HNE, HNE-2H <sub>2</sub> O /HNE-H <sub>2</sub> O |                   |                  |
| K*QTALVELVKHK*PK                           | K525/K536    | HNE-H <sub>2</sub> O/HNE-H <sub>2</sub> O        | O                 |                  |
| QTALVELVKHK*PK                             | K536         | HNE-H <sub>2</sub> O                             | O                 | Δ                |
| ATK*EQLK                                   | K541         | HNE-2H <sub>2</sub> O                            |                   |                  |
| ATKEQLK*AVMDDFAAFVEK                       | K545         | HNE-H <sub>2</sub> O                             |                   |                  |
| EQLK*AVMDDFAAFVEK                          | K545         | HNE, HNE-H <sub>2</sub> O, HNE-2H <sub>2</sub> O |                   |                  |
| AVMDDFAAFVEK*CCK                           | K557         | HNE-2H <sub>2</sub> O                            |                   |                  |
| ADDK*ETCFAEEGKK                            | K564         | HNE                                              |                   |                  |
| ADDKETCFAEEGK*K                            | K573         | HNE-2H <sub>2</sub> O                            |                   |                  |
| K*LVAASQAALGL                              | K574         | HNE, HNE-2H <sub>2</sub> O                       |                   |                  |

\* indicates a modification site.

O indicates a peptide identified automatically.

Δ indicates a peptide identified manually.
